# Supplementary material
Source: PubMed Central journal article supplement (PMC3728189)
Supplement: bbug-4-197-s01.pdf [file bbug-4-197-s01.pdf]

## **Supplemental Material to:**

**Vincenzo F. Brancaccio, Daria S. Zhurina and Christian U.  
Riedel**

**Tough nuts to crack: Site-directed mutagenesis of  
bifidobacteria remains a challenge**

**Bioengineered 2013; 4(4)**

**<http://dx.doi.org/10.4161/bioe.23381>**

**<http://www.landesbioscience.com/journals/bioe/article/23381/>**

1 Table S1: Bacterial strains, plasmids and primers used in this study

| Name                      | Relevant feature                                                                                                                                      |                         |
|---------------------------|-------------------------------------------------------------------------------------------------------------------------------------------------------|-------------------------|
| <b>Strains</b>            |                                                                                                                                                       |                         |
| <i>E. coli</i> DH10B      | Cloning host                                                                                                                                          | Invitrogen              |
| <i>E. coli</i> ET12567    | Plasmid artificial modification host strain                                                                                                           | 32                      |
| <i>B. bifidum</i> S17     | Fecal isolate from a breast-fed infant                                                                                                                | 24                      |
| <b>Plasmids</b>           |                                                                                                                                                       |                         |
| p16Slux                   | Chromosomal integration vector for constitutive luminescent labelling of Gram-negative bacteria                                                       | 31                      |
| p16S                      | Backbone of p16Slux lacking <i>luxABCDE</i>                                                                                                           | this study              |
| pREDI                     | Template for amplification of <i>araC</i> and $P_{araB}$                                                                                              | 30                      |
| pBAD                      | Intermediate vector to clone methylase genes under control of $P_{araB}$                                                                              | this study              |
| p16S_ <i>hsdMS</i>        | Chromosomal integration vector for arabinose inducible expression of HsdMS of <i>B. bifidum</i> S17 in <i>E. coli</i> ET12567                         | this study              |
| p16S_ <i>bbif0710</i>     | Chromosomal integration vector for arabinose inducible expression of the type II MTase (BBIF_0710) of <i>B. bifidum</i> S17 in <i>E. coli</i> ET12567 | this study              |
| <b>Primers for RT-PCR</b> |                                                                                                                                                       |                         |
|                           | <b>Sequence 5'-3'</b>                                                                                                                                 | <b>Amplicon [bp]</b>    |
| rt_ <i>hsdM</i> _fwd      | GAC GCA GCA GAT CAT TTG CCA GAG TCT CC                                                                                                                | 1002                    |
| rt_ <i>hsdM</i> _rev      | ACA CCT ACA ACC TCA CGC GCA TGA ACC                                                                                                                   |                         |
| rt_ <i>hsdS</i> _fwd      | ATG ATG ACT GAA CAG GCG AAA GTT CC                                                                                                                    | 1242                    |
| rt_ <i>hsdS</i> _rev      | TCA CAC GAA CAT CCT GTC AAG CAA GG                                                                                                                    |                         |
| rt_ <i>hsdR</i> _fwd      | GCC ACT GAT ACG GTT TCC                                                                                                                               | 889                     |
| rt_ <i>hsdR</i> _rev      | GCT CAT CGG CTT CTA CAC                                                                                                                               |                         |
| rt_ <i>t2mtase</i> _fwd   | TCC AGA TGG CAC GGC AAT ACG AC                                                                                                                        | 724                     |
| rt_ <i>t2mtase</i> _rev   | CAT ACG TTC GGG CTC GAC AAG GTT C                                                                                                                     |                         |
| rt_ <i>t2rease</i> _fwd   | GAG ACT GCG ATA CTC GGC ATG TAT AG                                                                                                                    | 671                     |
| rt_ <i>t2rease</i> _rev   | CCC GAC TCA ATC GTC GTC ATA AAC                                                                                                                       |                         |
| <b>Cloning primers</b>    |                                                                                                                                                       |                         |
|                           | <b>Sequence 5'-3'</b>                                                                                                                                 | <b>Restriction site</b> |
| <i>hsdMS</i> _fwd         | TGC GCA GGA <u>CTA</u> <u>GTA</u> TGA ATA AGC AGC AGC TCG                                                                                             | SpeI                    |
| <i>hsdMS</i> _rev         | TCC <u>TCT</u> <u>CGA</u> <u>GTA</u> GGT GTT GGC GAA GGC GGA GTA GGT C                                                                                | XhoI                    |
| <i>bbif0710</i> _fwd      | TGC TGC <u>ACT</u> <u>AGT</u> ATG CCC GCC GAG CAT GGT GTT ATT TAC                                                                                     | SpeI                    |
| <i>bbif0710</i> _rev      | CAT CAT <u>ATC</u> <u>GAT</u> CGC AGC ACG CGC CAT AGC ACT ATA C                                                                                       | Clal                    |
| pBAD_fwd                  | AAT <u>GCG</u> <u>GCC</u> <u>GCC</u> GCG TAA TAC GAC TCA C                                                                                            | NotI                    |
| pBAD_rev                  | AAT <u>GCG</u> <u>GCC</u> <u>GCG</u> CGC AAT TAA CCC TCA C                                                                                            | NotI                    |

2

3
